# Supplementary material for: Plant F-Box Protein Evolution Is Determined by Lineage-Specific Timing of Major Gene Family Expansion Waves
Source: PLoS One. 2013 Jul 19;8(7):e68672. doi: 10.1371/journal.pone.0068672 (PMC3719486; doi:10.1371/journal.pone.0068672)
Supplement: Dataset S2 — (XLS) [file pone.0068672.s011.xls]

## Sheet: stable FBAS
UNIQID	NAME	avg_1: ATGE_1_A, ATGE_1_B, ATGE_1_C [AtGenExpress_Plus_1]	avg_10: ATGE_10_A, ATGE_10_B, ATGE_10_C [AtGenExpress_Plus_1]	avg_12: ATGE_12_A, ATGE_12_B, ATGE_12_C [AtGenExpress_Plus_1]	avg_13: ATGE_13_A, ATGE_13_B, ATGE_13_C [AtGenExpress_Plus_1]	avg_14: ATGE_14_A, ATGE_14_B, ATGE_14_C [AtGenExpress_Plus_1]	avg_15: ATGE_15_A, ATGE_15_B, ATGE_15_C [AtGenExpress_Plus_1]	avg_16: ATGE_16_A, ATGE_16_B, ATGE_16_C [AtGenExpress_Plus_1]	avg_17: ATGE_17_A, ATGE_17_B, ATGE_17_C [AtGenExpress_Plus_1]	avg_19: ATGE_19_A, ATGE_19_B, ATGE_19_C [AtGenExpress_Plus_1]	avg_2: ATGE_2_A, ATGE_2_B, ATGE_2_C [AtGenExpress_Plus_1]	avg_20: ATGE_20_A, ATGE_20_B, ATGE_20_C [AtGenExpress_Plus_1]	avg_21: ATGE_21_A, ATGE_21_B, ATGE_21_C [AtGenExpress_Plus_1]	avg_22: ATGE_22_A, ATGE_22_B, ATGE_22_C [AtGenExpress_Plus_1]	avg_23: ATGE_23_A, ATGE_23_B, ATGE_23_C [AtGenExpress_Plus_1]	avg_24: ATGE_24_A, ATGE_24_B, ATGE_24_C [AtGenExpress_Plus_1]	avg_25: ATGE_25_A, ATGE_25_B, ATGE_25_C [AtGenExpress_Plus_1]	avg_26: ATGE_26_A, ATGE_26_B, ATGE_26_C [AtGenExpress_Plus_1]	avg_27: ATGE_27_A, ATGE_27_B, ATGE_27_C [AtGenExpress_Plus_1]	avg_28: ATGE_28_A2, ATGE_28_B2, ATGE_28_C2 [AtGenExpress_Plus_1]	avg_29: ATGE_29_A2, ATGE_29_B2, ATGE_29_C2 [AtGenExpress_Plus_1]	avg_3: ATGE_3_A, ATGE_3_B, ATGE_3_C [AtGenExpress_Plus_1]	avg_31: ATGE_31_A2, ATGE_31_B2, ATGE_31_C2 [AtGenExpress_Plus_1]	avg_32: ATGE_32_A2, ATGE_32_B2, ATGE_32_C2 [AtGenExpress_Plus_1]	avg_33: ATGE_33_A, ATGE_33_B, ATGE_33_C [AtGenExpress_Plus_1]	avg_34: ATGE_34_A, ATGE_34_B, ATGE_34_C [AtGenExpress_Plus_1]	avg_35: ATGE_35_A, ATGE_35_B, ATGE_35_C [AtGenExpress_Plus_1]	avg_36: ATGE_36_A, ATGE_36_B, ATGE_36_C [AtGenExpress_Plus_1]	avg_37: ATGE_37_A, ATGE_37_B, ATGE_37_C [AtGenExpress_Plus_1]	avg_39: ATGE_39_A, ATGE_39_B, ATGE_39_C [AtGenExpress_Plus_1]	avg_4: ATGE_4_A, ATGE_4_B, ATGE_4_C [AtGenExpress_Plus_1]	avg_40: ATGE_40_A, ATGE_40_B, ATGE_40_C [AtGenExpress_Plus_1]	avg_41: ATGE_41_A, ATGE_41_B, ATGE_41_C [AtGenExpress_Plus_1]	avg_42: ATGE_42_B, ATGE_42_C, ATGE_42_D [AtGenExpress_Plus_1]	avg_43: ATGE_43_A, ATGE_43_B, ATGE_43_C [AtGenExpress_Plus_1]	avg_45: ATGE_45_A, ATGE_45_B, ATGE_45_C [AtGenExpress_Plus_1]	avg_5: ATGE_5_A, ATGE_5_B, ATGE_5_C [AtGenExpress_Plus_1]	avg_6: ATGE_6_A, ATGE_6_B, ATGE_6_C [AtGenExpress_Plus_1]	avg_7: ATGE_7_A2, ATGE_7_B2, ATGE_7_C2 [AtGenExpress_Plus_1]	avg_8: ATGE_8_A, ATGE_8_B, ATGE_8_C [AtGenExpress_Plus_1]	avg_9: ATGE_9_A, ATGE_9_B, ATGE_9_C [AtGenExpress_Plus_1]	avg_73: ATGE_73_A, ATGE_73_B, ATGE_73_C [AtGenExpress_Plus_2]	avg_0_12A: RIKEN-NAKABAYASHI1A, RIKEN-NAKABAYASHI1B [AtGenExpress_Plus_3]	avg_0_12B: RIKEN-NAKABAYASHI2A, RIKEN-NAKABAYASHI2B [AtGenExpress_Plus_3]	avg_76: ATGE_76_A, ATGE_76_B, ATGE_76_C [AtGenExpress_Plus_3]	avg_77: ATGE_77_D, ATGE_77_E, ATGE_77_F [AtGenExpress_Plus_3]	avg_78: ATGE_78_D, ATGE_78_E, ATGE_78_F [AtGenExpress_Plus_3]	avg_79: ATGE_79_A, ATGE_79_B, ATGE_79_C [AtGenExpress_Plus_3]	avg_81: ATGE_81_A, ATGE_81_B, ATGE_81_C [AtGenExpress_Plus_3]
#category		Developmental Baseline	Developmental Baseline	Developmental Baseline	Developmental Baseline	Developmental Baseline	Developmental Baseline	Developmental Baseline	Developmental Baseline	Developmental Baseline	Developmental Baseline	Developmental Baseline	Developmental Baseline	Developmental Baseline	Developmental Baseline	Developmental Baseline	Developmental Baseline	Developmental Baseline	Developmental Baseline	Developmental Baseline	Developmental Baseline	Developmental Baseline	Developmental Baseline	Developmental Baseline	Developmental Baseline	Developmental Baseline	Developmental Baseline	Developmental Baseline	Developmental Baseline	Developmental Baseline	Developmental Baseline	Developmental Baseline	Developmental Baseline	Developmental Baseline	Developmental Baseline	Developmental Baseline	Developmental Baseline	Developmental Baseline	Developmental Baseline	Developmental Baseline	Developmental Baseline	Pollen	Seed and Silique Development	Seed and Silique Development	Seed and Silique Development	Seed and Silique Development	Seed and Silique Development	Seed and Silique Development	Seed and Silique Development
#age		1	1.02	1.04	1.04	1.04	1.04	1.04	1.04	1.04	1	1.04	1.04	1.09	1.11	1.12	6.1	1.1	1.1	1.1	1.09	1	1.1	1.1	1.1	1.1	1.1	1.1	1.1	1.1	1	1.1	1.1	1.1	1.1	1.1	1	1	1	1.03	1.04	6.5	0	0.1	9.7	9.7	9.7	9.7	9.7
#tissue		Cotyledon	Rosette Leaf 4	Rosette Leaf 2	Rosette Leaf 4	Rosette Leaf 6	Rosette Leaf 8	Rosette Leaf 10	Rosette Leaf 12	Leaf 7, Petiole	Hypocotyl	Leaf 7, Proximal Half	Leaf 7, Distal Half	Entire Rosette After Transition to Flowering	Entire Rosette After Transition to Flowering	Entire Rosette After Transition to Flowering	Senescing Leaf	Cauline Leaf	Stem, 2nd Internode	1st Node	Shoot Apex, Inflorescence	Root	Flower Stage 9	Flower Stage 10/11	Flower Stage 12	Flowers Stage 12, Sepals	Flowers Stage 12, Petals	Flowers Stage 12, Stamens	Flowers Stage 12, Carpels	Flower Stage 15	Shoot Apex, Vegetative + Young Leaves	Flowers Stage 15, Pedicels	Flowers Stage 15, Sepals	Flowers Stage 15, Petals	Flowers Stage 15, Stamen	Flowers Stage 15, Carpels	Leaf 1 + 2	Shoot Apex, Vegetative	Seedling, Green Parts	Shoot Apex, Transition	Root	Mature Pollen	seed	seed	Seeds Stage 3 w/ Siliques	Seeds Stage 4 w/ Siliques	Seeds Stage 5 w/ Siliques	Seeds Stage 6 w/o Siliques	Seeds Stage 7 w/o Siliques
#control		No	No	No	No	No	No	No	No	No	No	No	No	No	No	No	No	No	No	No	No	No	No	No	No	No	No	No	No	No	No	No	No	No	No	No	No	No	No	No	No	No	No	No	No	No	No	No	No
#mutant		Wt	Wt	Wt	Wt	Wt	Wt	Wt	Wt	Wt	Wt	Wt	Wt	Wt	Wt	Wt	Wt	Wt	Wt	Wt	Wt	Wt	Wt	Wt	Wt	Wt	Wt	Wt	Wt	Wt	Wt	Wt	Wt	Wt	Wt	Wt	Wt	Wt	Wt	Wt	Wt	Wt	wt Col-0	wt Col-0	Wt	Wt	Wt	Wt	Wt
#timecourse
At3g06240	256399_at| F-box family protein|	86.87	63.73	118.6	109.92	103.82	86.78	94.47	74.53	109.68	96.2	108.25	120.98	82.55	94.52	107.9	167.08	129.15	142.45	131.32	120.93	94.45	128.22	115.13	122.38	79.93	116.3	151.12	105.55	104.43	75.7	91.87	127.05	138.5	147.55	102.95	60.32	88.53	65.52	124.75	97.17	123.62	134.21	96.7	112.17	133.52	126.68	129.2	114.68
At3g07870	258647_at| F-box and associated interaction domains-containing protein|	107.95	35.92	142.85	164.87	128.65	107.47	87.18	74.63	82.73	73.7	103.27	153.1	101.38	81.35	84.25	199.63	219.73	322.65	116.43	16.67	63.03	23.27	38.77	37.75	72.42	18.72	109.78	23.4	70.8	20.03	70.27	119.15	69.95	103.35	34	52.03	23.67	50.15	12.73	87.93	441.92	12.05	19.12	45.68	62.27	52.68	14.57	16.37
At4g33160	253364_at| F-box family protein|	32.15	30.53	23.52	16.77	26.1	22.72	30.25	37.93	22.75	46.92	32.57	32.53	28.68	24	23.52	27.23	15.85	13.68	11.6	55.92	57.82	44.47	38.52	26.25	16.87	33.45	10.53	53.93	15.65	35.47	11.22	26.47	15.82	12.8	18.73	37.65	39.8	40.27	52.55	81.12	18.1	5.02	41.9	19.12	30.72	43.73	61.57	29.73
[truncated: 72 more columns]

## Sheet: unstable FBAs
UNIQID	NAME	1/CTRL_7: ATGE_1_A, ATGE_1_B, ATGE_1_C [AtGenExpress_Plus_1]	10/CTRL_7: ATGE_10_A, ATGE_10_B, ATGE_10_C [AtGenExpress_Plus_1]	12/CTRL_7: ATGE_12_A, ATGE_12_B, ATGE_12_C [AtGenExpress_Plus_1]	13/CTRL_7: ATGE_13_A, ATGE_13_B, ATGE_13_C [AtGenExpress_Plus_1]	14/CTRL_7: ATGE_14_A, ATGE_14_B, ATGE_14_C [AtGenExpress_Plus_1]	15/CTRL_7: ATGE_15_A, ATGE_15_B, ATGE_15_C [AtGenExpress_Plus_1]	16/CTRL_7: ATGE_16_A, ATGE_16_B, ATGE_16_C [AtGenExpress_Plus_1]	17/CTRL_7: ATGE_17_A, ATGE_17_B, ATGE_17_C [AtGenExpress_Plus_1]	19/CTRL_7: ATGE_19_A, ATGE_19_B, ATGE_19_C [AtGenExpress_Plus_1]	2/CTRL_7: ATGE_2_A, ATGE_2_B, ATGE_2_C [AtGenExpress_Plus_1]	20/CTRL_7: ATGE_20_A, ATGE_20_B, ATGE_20_C [AtGenExpress_Plus_1]	21/CTRL_7: ATGE_21_A, ATGE_21_B, ATGE_21_C [AtGenExpress_Plus_1]	22/CTRL_7: ATGE_22_A, ATGE_22_B, ATGE_22_C [AtGenExpress_Plus_1]	23/CTRL_7: ATGE_23_A, ATGE_23_B, ATGE_23_C [AtGenExpress_Plus_1]	24/CTRL_7: ATGE_24_A, ATGE_24_B, ATGE_24_C [AtGenExpress_Plus_1]	25/CTRL_7: ATGE_25_A, ATGE_25_B, ATGE_25_C [AtGenExpress_Plus_1]	26/CTRL_7: ATGE_26_A, ATGE_26_B, ATGE_26_C [AtGenExpress_Plus_1]	27/CTRL_7: ATGE_27_A, ATGE_27_B, ATGE_27_C [AtGenExpress_Plus_1]	28/CTRL_7: ATGE_28_A2, ATGE_28_B2, ATGE_28_C2 [AtGenExpress_Plus_1]	29/CTRL_7: ATGE_29_A2, ATGE_29_B2, ATGE_29_C2 [AtGenExpress_Plus_1]	3/CTRL_7: ATGE_3_A, ATGE_3_B, ATGE_3_C [AtGenExpress_Plus_1]	31/CTRL_7: ATGE_31_A2, ATGE_31_B2, ATGE_31_C2 [AtGenExpress_Plus_1]	32/CTRL_7: ATGE_32_A2, ATGE_32_B2, ATGE_32_C2 [AtGenExpress_Plus_1]	33/CTRL_7: ATGE_33_A, ATGE_33_B, ATGE_33_C [AtGenExpress_Plus_1]	34/CTRL_7: ATGE_34_A, ATGE_34_B, ATGE_34_C [AtGenExpress_Plus_1]	35/CTRL_7: ATGE_35_A, ATGE_35_B, ATGE_35_C [AtGenExpress_Plus_1]	36/CTRL_7: ATGE_36_A, ATGE_36_B, ATGE_36_C [AtGenExpress_Plus_1]	37/CTRL_7: ATGE_37_A, ATGE_37_B, ATGE_37_C [AtGenExpress_Plus_1]	39/CTRL_7: ATGE_39_A, ATGE_39_B, ATGE_39_C [AtGenExpress_Plus_1]	4/CTRL_7: ATGE_4_A, ATGE_4_B, ATGE_4_C [AtGenExpress_Plus_1]	40/CTRL_7: ATGE_40_A, ATGE_40_B, ATGE_40_C [AtGenExpress_Plus_1]	41/CTRL_7: ATGE_41_A, ATGE_41_B, ATGE_41_C [AtGenExpress_Plus_1]	42/CTRL_7: ATGE_42_B, ATGE_42_C, ATGE_42_D [AtGenExpress_Plus_1]	43/CTRL_7: ATGE_43_A, ATGE_43_B, ATGE_43_C [AtGenExpress_Plus_1]	45/CTRL_7: ATGE_45_A, ATGE_45_B, ATGE_45_C [AtGenExpress_Plus_1]	5/CTRL_7: ATGE_5_A, ATGE_5_B, ATGE_5_C [AtGenExpress_Plus_1]	6/CTRL_7: ATGE_6_A, ATGE_6_B, ATGE_6_C [AtGenExpress_Plus_1]	7/CTRL_7: ATGE_7_A2, ATGE_7_B2, ATGE_7_C2 [AtGenExpress_Plus_1]	8/CTRL_7: ATGE_8_A, ATGE_8_B, ATGE_8_C [AtGenExpress_Plus_1]	9/CTRL_7: ATGE_9_A, ATGE_9_B, ATGE_9_C [AtGenExpress_Plus_1]	73/CTRL_7: ATGE_73_A, ATGE_73_B, ATGE_73_C [AtGenExpress_Plus_2]	0_12A/CTRL_7: RIKEN-NAKABAYASHI1A, RIKEN-NAKABAYASHI1B [AtGenExpress_Plus_3]	0_12B/CTRL_7: RIKEN-NAKABAYASHI2A, RIKEN-NAKABAYASHI2B [AtGenExpress_Plus_3]	76/CTRL_7: ATGE_76_A, ATGE_76_B, ATGE_76_C [AtGenExpress_Plus_3]	77/CTRL_7: ATGE_77_D, ATGE_77_E, ATGE_77_F [AtGenExpress_Plus_3]	78/CTRL_7: ATGE_78_D, ATGE_78_E, ATGE_78_F [AtGenExpress_Plus_3]	79/CTRL_7: ATGE_79_A, ATGE_79_B, ATGE_79_C [AtGenExpress_Plus_3]	81/CTRL_7: ATGE_81_A, ATGE_81_B, ATGE_81_C [AtGenExpress_Plus_3]
#category		Developmental Baseline	Developmental Baseline	Developmental Baseline	Developmental Baseline	Developmental Baseline	Developmental Baseline	Developmental Baseline	Developmental Baseline	Developmental Baseline	Developmental Baseline	Developmental Baseline	Developmental Baseline	Developmental Baseline	Developmental Baseline	Developmental Baseline	Developmental Baseline	Developmental Baseline	Developmental Baseline	Developmental Baseline	Developmental Baseline	Developmental Baseline	Developmental Baseline	Developmental Baseline	Developmental Baseline	Developmental Baseline	Developmental Baseline	Developmental Baseline	Developmental Baseline	Developmental Baseline	Developmental Baseline	Developmental Baseline	Developmental Baseline	Developmental Baseline	Developmental Baseline	Developmental Baseline	Developmental Baseline	Developmental Baseline	Developmental Baseline	Developmental Baseline	Developmental Baseline	Pollen	Seed and Silique Development	Seed and Silique Development	Seed and Silique Development	Seed and Silique Development	Seed and Silique Development	Seed and Silique Development	Seed and Silique Development
#age		1	1.02	1.04	1.04	1.04	1.04	1.04	1.04	1.04	1	1.04	1.04	1.09	1.11	1.12	6.1	1.1	1.1	1.1	1.09	1	1.1	1.1	1.1	1.1	1.1	1.1	1.1	1.1	1	1.1	1.1	1.1	1.1	1.1	1	1	1	1.03	1.04	6.5	0	0.1	9.7	9.7	9.7	9.7	9.7
UNIQID	NAME	avg_1: ATGE_1_A, ATGE_1_B, ATGE_1_C [AtGenExpress_Plus_1]	avg_10: ATGE_10_A, ATGE_10_B, ATGE_10_C [AtGenExpress_Plus_1]	avg_12: ATGE_12_A, ATGE_12_B, ATGE_12_C [AtGenExpress_Plus_1]	avg_13: ATGE_13_A, ATGE_13_B, ATGE_13_C [AtGenExpress_Plus_1]	avg_14: ATGE_14_A, ATGE_14_B, ATGE_14_C [AtGenExpress_Plus_1]	avg_15: ATGE_15_A, ATGE_15_B, ATGE_15_C [AtGenExpress_Plus_1]	avg_16: ATGE_16_A, ATGE_16_B, ATGE_16_C [AtGenExpress_Plus_1]	avg_17: ATGE_17_A, ATGE_17_B, ATGE_17_C [AtGenExpress_Plus_1]	avg_19: ATGE_19_A, ATGE_19_B, ATGE_19_C [AtGenExpress_Plus_1]	avg_2: ATGE_2_A, ATGE_2_B, ATGE_2_C [AtGenExpress_Plus_1]	avg_20: ATGE_20_A, ATGE_20_B, ATGE_20_C [AtGenExpress_Plus_1]	avg_21: ATGE_21_A, ATGE_21_B, ATGE_21_C [AtGenExpress_Plus_1]	avg_22: ATGE_22_A, ATGE_22_B, ATGE_22_C [AtGenExpress_Plus_1]	avg_23: ATGE_23_A, ATGE_23_B, ATGE_23_C [AtGenExpress_Plus_1]	avg_24: ATGE_24_A, ATGE_24_B, ATGE_24_C [AtGenExpress_Plus_1]	avg_25: ATGE_25_A, ATGE_25_B, ATGE_25_C [AtGenExpress_Plus_1]	avg_26: ATGE_26_A, ATGE_26_B, ATGE_26_C [AtGenExpress_Plus_1]	avg_27: ATGE_27_A, ATGE_27_B, ATGE_27_C [AtGenExpress_Plus_1]	avg_28: ATGE_28_A2, ATGE_28_B2, ATGE_28_C2 [AtGenExpress_Plus_1]	avg_29: ATGE_29_A2, ATGE_29_B2, ATGE_29_C2 [AtGenExpress_Plus_1]	avg_3: ATGE_3_A, ATGE_3_B, ATGE_3_C [AtGenExpress_Plus_1]	avg_31: ATGE_31_A2, ATGE_31_B2, ATGE_31_C2 [AtGenExpress_Plus_1]	avg_32: ATGE_32_A2, ATGE_32_B2, ATGE_32_C2 [AtGenExpress_Plus_1]	avg_33: ATGE_33_A, ATGE_33_B, ATGE_33_C [AtGenExpress_Plus_1]	avg_34: ATGE_34_A, ATGE_34_B, ATGE_34_C [AtGenExpress_Plus_1]	avg_35: ATGE_35_A, ATGE_35_B, ATGE_35_C [AtGenExpress_Plus_1]	avg_36: ATGE_36_A, ATGE_36_B, ATGE_36_C [AtGenExpress_Plus_1]	avg_37: ATGE_37_A, ATGE_37_B, ATGE_37_C [AtGenExpress_Plus_1]	avg_39: ATGE_39_A, ATGE_39_B, ATGE_39_C [AtGenExpress_Plus_1]	avg_4: ATGE_4_A, ATGE_4_B, ATGE_4_C [AtGenExpress_Plus_1]	avg_40: ATGE_40_A, ATGE_40_B, ATGE_40_C [AtGenExpress_Plus_1]	avg_41: ATGE_41_A, ATGE_41_B, ATGE_41_C [AtGenExpress_Plus_1]	avg_42: ATGE_42_B, ATGE_42_C, ATGE_42_D [AtGenExpress_Plus_1]	avg_43: ATGE_43_A, ATGE_43_B, ATGE_43_C [AtGenExpress_Plus_1]	avg_45: ATGE_45_A, ATGE_45_B, ATGE_45_C [AtGenExpress_Plus_1]	avg_5: ATGE_5_A, ATGE_5_B, ATGE_5_C [AtGenExpress_Plus_1]	avg_6: ATGE_6_A, ATGE_6_B, ATGE_6_C [AtGenExpress_Plus_1]	avg_7: ATGE_7_A2, ATGE_7_B2, ATGE_7_C2 [AtGenExpress_Plus_1]	avg_8: ATGE_8_A, ATGE_8_B, ATGE_8_C [AtGenExpress_Plus_1]	avg_9: ATGE_9_A, ATGE_9_B, ATGE_9_C [AtGenExpress_Plus_1]	avg_73: ATGE_73_A, ATGE_73_B, ATGE_73_C [AtGenExpress_Plus_2]	avg_0_12A: RIKEN-NAKABAYASHI1A, RIKEN-NAKABAYASHI1B [AtGenExpress_Plus_3]	avg_0_12B: RIKEN-NAKABAYASHI2A, RIKEN-NAKABAYASHI2B [AtGenExpress_Plus_3]	avg_76: ATGE_76_A, ATGE_76_B, ATGE_76_C [AtGenExpress_Plus_3]	avg_77: ATGE_77_D, ATGE_77_E, ATGE_77_F [AtGenExpress_Plus_3]	avg_78: ATGE_78_D, ATGE_78_E, ATGE_78_F [AtGenExpress_Plus_3]	avg_79: ATGE_79_A, ATGE_79_B, ATGE_79_C [AtGenExpress_Plus_3]	avg_81: ATGE_81_A, ATGE_81_B, ATGE_81_C [AtGenExpress_Plus_3]
#category		Developmental Baseline	Developmental Baseline	Developmental Baseline	Developmental Baseline	Developmental Baseline	Developmental Baseline	Developmental Baseline	Developmental Baseline	Developmental Baseline	Developmental Baseline	Developmental Baseline	Developmental Baseline	Developmental Baseline	Developmental Baseline	Developmental Baseline	Developmental Baseline	Developmental Baseline	Developmental Baseline	Developmental Baseline	Developmental Baseline	Developmental Baseline	Developmental Baseline	Developmental Baseline	Developmental Baseline	Developmental Baseline	Developmental Baseline	Developmental Baseline	Developmental Baseline	Developmental Baseline	Developmental Baseline	Developmental Baseline	Developmental Baseline	Developmental Baseline	Developmental Baseline	Developmental Baseline	Developmental Baseline	Developmental Baseline	Developmental Baseline	Developmental Baseline	Developmental Baseline	Pollen	Seed and Silique Development	Seed and Silique Development	Seed and Silique Development	Seed and Silique Development	Seed and Silique Development	Seed and Silique Development	Seed and Silique Development
#age		1	1.02	1.04	1.04	1.04	1.04	1.04	1.04	1.04	1	1.04	1.04	1.09	1.11	1.12	6.1	1.1	1.1	1.1	1.09	1	1.1	1.1	1.1	1.1	1.1	1.1	1.1	1.1	1	1.1	1.1	1.1	1.1	1.1	1	1	1	1.03	1.04	6.5	0	0.1	9.7	9.7	9.7	9.7	9.7
#tissue		Cotyledon	Rosette Leaf 4	Rosette Leaf 2	Rosette Leaf 4	Rosette Leaf 6	Rosette Leaf 8	Rosette Leaf 10	Rosette Leaf 12	Leaf 7, Petiole	Hypocotyl	Leaf 7, Proximal Half	Leaf 7, Distal Half	Entire Rosette After Transition to Flowering	Entire Rosette After Transition to Flowering	Entire Rosette After Transition to Flowering	Senescing Leaf	Cauline Leaf	Stem, 2nd Internode	1st Node	Shoot Apex, Inflorescence	Root	Flower Stage 9	Flower Stage 10/11	Flower Stage 12	Flowers Stage 12, Sepals	Flowers Stage 12, Petals	Flowers Stage 12, Stamens	Flowers Stage 12, Carpels	Flower Stage 15	Shoot Apex, Vegetative + Young Leaves	Flowers Stage 15, Pedicels	Flowers Stage 15, Sepals	Flowers Stage 15, Petals	Flowers Stage 15, Stamen	Flowers Stage 15, Carpels	Leaf 1 + 2	Shoot Apex, Vegetative	Seedling, Green Parts	Shoot Apex, Transition	Root	Mature Pollen	seed	seed	Seeds Stage 3 w/ Siliques	Seeds Stage 4 w/ Siliques	Seeds Stage 5 w/ Siliques	Seeds Stage 6 w/o Siliques	Seeds Stage 7 w/o Siliques
#control		No	No	No	No	No	No	No	No	No	No	No	No	No	No	No	No	No	No	No	No	No	No	No	No	No	No	No	No	No	No	No	No	No	No	No	No	No	No	No	No	No	No	No	No	No	No	No	No
#mutant		Wt	Wt	Wt	Wt	Wt	Wt	Wt	Wt	Wt	Wt	Wt	Wt	Wt	Wt	Wt	Wt	Wt	Wt	Wt	Wt	Wt	Wt	Wt	Wt	Wt	Wt	Wt	Wt	Wt	Wt	Wt	Wt	Wt	Wt	Wt	Wt	Wt	Wt	Wt	Wt	Wt	wt Col-0	wt Col-0	Wt	Wt	Wt	Wt	Wt
#timecourse
At1g11270	262510_at| F-box and associated interaction domains-containing protein|	0.37	0.21	0.78	0.57	0.61	0.48	0.26	0.25	0.74	0.79	0.22	0.52	0.54	0.32	0.25	2.05	1.86	1.82	1.07	1.74	1.6	2.22	1.76	1.14	0.81	1.87	1.48	2.24	0.69	0.6	1.09	0.98	0.65	0.32	2	0.31	0.82	0.18	1.81	2.32	0.33	2.63	2.52	0.61	0.87	1.01	1.78	1.35
At1g11810|At3g13830	257604_s_at| F-box associated ubiquitination effector family protein|F-box associated ubiquitination effector family protein|	0.32	1.68	1.55	0.63	0.3	0.53	1.8	0.92	0.25	1.78	1.03	1.55	1.52	1.17	0.58	2.07	0.9	0.2	0.22	1.17	2.4	1.48	0.92	1.68	1.27	1.88	1.07	0.93	0.57	0.28	1.23	1.17	2.15	0.37	1.55	0.18	0.52	1.32	1.63	1.22	4.12	2.3	0.2	2.98	3.65	3.08	3	1.57
At1g12190	261024_at| F-box and associated interaction domains-containing protein|	6.17	3.95	6.38	5.17	6.75	3.68	4.05	4.78	4.05	6.48	4.03	6.67	5.22	1.25	3.3	8.33	8.23	3.22	1	6.25	5.73	3.45	4.87	2.35	5.02	9.07	5.45	3.17	3.2	4.1	3.53	6.5	4.32	5.68	4.57	2.45	4.42	6.35	2.55	6.92	14.22	4.75	3.95	5.7	15.92	6.48	4.02	7.15
At1g13200	262771_at| F-box and associated interaction domains-containing protein|	4.45	5.17	7.17	1.15	6.97	3.08	4.72	3.37	2.57	5.3	7.37	3.27	4.27	2.15	9.65	7.03	8.22	5.93	4.3	5.5	3.88	5.08	5.42	2.12	4.18	6.32	5.23	5.2	4.52	4.47	3.3	7.93	2.77	3.22	4.38	3.07	10.4	7.2	3.73	5.22	11.48	5.18	1.01	6.47	6.67	5.07	8.58	4.8
At1g19160	256037_at| F-box family protein|	0.79	1.14	1.06	0.92	1.17	1.02	1.1	1.33	0.76	1.19	1.03	1.25	1.16	1.13	0.84	0.9	1.06	1.08	0.68	1.05	0.91	0.64	0.82	1.08	1.23	0.8	0.97	1	0.94	0.78	0.92	1.07	0.81	0.97	0.87	1.59	1.17	0.88	0.8	0.89	1.61	0.9	0.74	1.75	1.26	1.08	1.55	1.25
At1g24881	245651_s_at| F-box family protein|	0.69	0.72	0.77	0.7	0.78	0.58	0.66	0.67	0.67	0.88	0.73	0.68	0.66	0.9	0.91	1.38	1.04	0.86	0.83	1.49	0.98	1.49	1.03	1.08	0.66	0.78	1.09	1.3	1.07	0.84	0.72	1.14	1.03	1.06	1.26	0.6	1.13	0.63	1.18	0.8	1.1	1.74	1.23	0.95	1.3	1.24	1.22	1.22
At1g25141	245651_s_at| F-box associated ubiquitination effector family protein|	455.55	472.95	509.73	461.13	515.35	381.07	437.28	443.12	441.03	578.52	484.2	446.82	432.97	595.1	601.07	914.32	688.2	564.73	549.47	980.57	647.73	985.75	680.53	714.67	438.52	516.93	716.62	858.02	708.07	556.15	473.8	754.75	682.53	697.5	829.15	399.08	746.78	416.05	778.02	530.2	723.22	1151.72	813.16	628.47	859.68	815.55	807.02	808.67
At1g30790	264531_at| F-box and associated interaction domains-containing protein|	10.93	11.17	9.95	8.12	8.77	7.83	7.77	6.08	4.65	7.77	8.95	7.65	9.57	9.25	12.25	11.48	12.73	5.02	6.58	6.88	7.07	5.63	7.95	6.63	7.07	8.1	5.42	8.37	10.45	8.93	13.82	7.18	6.77	11.48	7.95	13.55	9.42	6.15	7.2	4.98	23.13	6.66	7.56	7.6	5.42	4.97	10.42	7.08
At1g31000	265156_at| F-box and associated interaction domains-containing protein|	11.18	10.98	8.08	4.88	8.72	6.38	11.77	12.43	4.48	7.47	11.08	6.73	7.8	6.43	9.88	5.23	4.62	7.23	5.7	6.32	6.05	4.18	4.37	5.27	9.07	5.43	3.03	6.33	7.05	8.98	6.98	10.12	4.32	10.65	6.08	9.87	6.8	9.05	5.1	5.7	18.75	4.54	4.77	6.08	6.15	6.92	4.82	7.37
At1g31080	263697_at| F-box family protein|	0.78	1.35	2.75	0.75	2.92	2.02	1.45	4.42	0.68	0.73	2.58	3.02	2.02	2.22	3.47	0.77	3.48	0.92	0.4	2.65	0.52	1.77	2.17	1.83	3.3	2.17	2.03	2.48	0.98	3.58	3	2.87	1.73	5.6	2.7	3.52	2.38	2.67	1.77	0.6	10.23	2.88	2.92	2.73	2.87	2.33	1.97	1.93
At1g32430	260692_at| F-box and associated interaction domains-containing protein|	16.27	14.02	13.93	13.05	13	11.78	11.08	14.93	15.32	13.85	13.53	13.02	12.87	14.92	15.37	14.42	13.85	10.33	8.5	11.33	14.55	10.93	12.28	14.57	11.03	14.2	15.25	10.63	13.08	14.05	14.82	12.68	12.57	12.48	11.07	17.22	15.77	11.78	12.88	11.83	32.93	9.81	12.96	13.07	16.1	16.35	16.85	17.07
At1g32660	261699_at| F-box and associated interaction domains-containing protein|	8.15	6.77	6.9	7.05	6.78	8.77	9.38	6.7	3.12	2.97	7.85	3.75	3.95	9.4	7.87	2.42	7.85	2	1.98	4.35	4.12	10.02	11.97	3.08	7.28	4.53	1.95	3.77	5.02	5.43	5.82	3.98	2.22	1.97	5.35	10.58	4.18	5.38	4.33	2.45	17.98	4.69	4.49	12.42	2.77	1.33	2.32	2.05
At1g46840	245802_at| F-box family protein|	9.78	12.53	7.98	8.28	9.17	6.93	9.52	10.07	5.53	8.77	8.77	7.77	8.93	6.92	8.32	7.88	7.42	5.52	4.4	7.3	6.97	7.52	7	6.08	6.47	6.5	5.63	6.8	8.35	7.93	7.82	6	5.8	8.62	8	14.02	9.97	5.78	6.72	7.07	13.83	8.26	8.65	4.1	4.95	7.23	7.92	8.63
At1g47340	261681_at| F-box and associated interaction domains-containing protein|	30.35	32.17	31.42	25.33	28.27	23.83	22.43	30.25	33.85	61.98	26.9	21.15	36.48	40.05	47.92	64.72	47.98	38.5	45.92	151.02	34.9	107.5	91	64	27.55	51.52	39.82	115.08	51.17	66.15	41.02	20.93	40.92	34.5	98.72	33.17	78.13	55.45	106.27	33.52	122.57	211.07	63.62	83.48	51.05	48.68	85.95	96.87
At1g47730	262439_at| F-box and associated interaction domains-containing protein|	0.6	0.85	1.17	0.75	1.95	1.08	1.13	1.85	0.7	3.6	1.6	0.63	0.53	1.22	0.85	0.98	0.77	0.85	0.5	0.83	1.38	1.42	0.92	1.58	1.5	2.85	0.45	2.12	1.27	1.4	0.93	1.47	1.97	1.42	0.62	0.78	0.58	0.45	0.67	0.48	6.45	0.48	0.65	1.72	1.82	0.87	4.32	2.15
At1g47765	261735_at| F-box and associated interaction domains-containing protein|	1.6	4.3	1.95	3.1	3.2	2.77	0.47	1.1	0.67	4.07	2.18	1.33	0.92	0.9	1.05	6.32	6.65	5.43	1.82	2.73	1.32	3.73	1.52	1.58	4	3.03	1.77	5.55	1.4	1.28	1.75	5.43	1.2	3.08	2.57	2.53	3.18	2.17	1.88	3.27	5.52	6.97	1.05	4.07	5.35	1.22	5.92	4.22
At1g47790	261734_at| F-box and associated interaction domains-containing protein|	5.5	5.07	5.28	4.17	4.87	3.08	3.45	2.02	2.08	3.85	3.3	4.48	6	3.15	0.93	5.62	4.73	0.72	3.2	2.78	4.28	2.57	0.93	4.05	2.28	2.17	3.2	1.2	1.33	3.35	2.25	1.13	1.45	0.77	4.2	4.03	2.4	2.33	4.92	3.9	7.63	2.88	4.31	5.17	2.13	1.57	6.32	2.92
At1g47810	261736_at| F-box and associated interaction domains-containing protein|	5.97	7.28	5.82	4.23	8.03	6.65	6.9	9.9	4.45	5.9	3.55	4.97	6.33	5.22	7.87	9.02	6.83	4.7	5.38	7	5.23	3.63	3.72	5.8	3.2	6.08	7.17	6.15	2.88	6.53	8.05	2.73	4.93	3.85	5.87	7.5	7.82	5.72	3.6	4.18	20.68	3.52	2.18	6.92	19.55	9.18	7.48	5.15
At1g48060	260721_at| F-box and associated interaction domains-containing protein|	2.35	1.2	1.65	2.58	1.9	1.5	5.05	1	0.93	1.22	1.8	2.5	1.07	0.63	0.77	6.35	1.35	2.48	0.7	1.72	1.23	3.27	4.8	2.5	1.5	3.75	1.15	4.25	1.9	1.75	2.78	3.47	1	3.9	1.87	2.5	2.42	1.77	1.5	4.67	7.92	0.61	0.72	2.77	1.95	2.03	2.62	4.83
At1g50870	249455_s_at| F-box and associated interaction domains-containing protein|	0.98	1.17	1.92	2.23	1.2	2.1	3.07	1.67	1.5	0.98	1.05	1.8	0.22	0.48	2.03	4.25	1.45	0.8	0.28	0.93	1	1.63	1.65	0.72	2.88	2.37	1.28	1.25	1.42	1.73	3.18	2.12	1.03	2.87	2.42	1.22	0.72	1.57	1.18	1.3	6.97	1.76	0.98	2.28	0.38	0.72	1.43	0.97
At1g51290	265137_at| F-box and associated interaction domains-containing protein|	2.82	2.08	3.28	2.83	5.53	1.55	3.55	7.55	3.75	2.3	4.83	3.88	4.95	2.62	2.68	3.88	3.7	2.58	2.58	2	3.38	2.65	1.73	2.98	4.07	2.78	1.97	1.48	1.08	3.28	1.78	3.75	1.23	2.22	3.23	3.73	5.37	4.82	1.63	2.6	20.15	1.22	1.74	4.35	3.1	3.25	2.48	1.33
At1g51320	265140_at| F-box and associated interaction domains-containing protein|	3.08	4.72	2.57	2.93	2.68	1.17	5.28	5.68	5.07	5.23	2.23	5.13	6.4	5.62	2.98	0.62	4.17	3.6	1.87	4.58	1.35	2.72	2.1	4.18	2.68	1.83	5.83	1.82	2.48	3.02	2.77	3	3.73	1.73	1.15	3.02	7.2	3.97	1.45	4.62	4.85	2.01	2.59	4.53	4.67	1.13	2.57	3.2
At1g53790	262255_at| F-box and associated interaction domains-containing protein|	12	6.98	14.08	10.85	13.5	10.7	12.9	10.75	10.58	25.27	8.15	8.1	12.32	14.55	12.72	34.2	20.77	47.08	33.77	7.37	21.92	17.93	20.38	19.33	20.53	24.7	51.42	18.35	27.57	8.73	21	38.87	47.7	36.02	14.65	7.55	11.98	10.47	11.35	24.95	22.82	218.77	65.78	12.28	16.12	20.28	22.03	30.18
At1g54550	262983_at| F-box and associated interaction domains-containing protein|	8.13	8.4	10.83	9.15	8.98	7.58	10.57	13.9	8.2	6.98	10.68	11.7	9.58	9.33	9.3	9.28	9.68	3.43	3.95	7.6	7.63	7.95	7.97	6.18	6.25	7.9	17.93	5.47	6.45	8.53	9.85	6.6	9.28	10.65	7.78	9.02	7.03	9.1	9.47	4.98	11.83	9.88	2.13	8.45	4.27	4.47	8.23	8.47
At1g59680	262125_at| EDA1__F-box associated ubiquitination effector family protein|	6.97	10.9	11.05	11.6	13.65	9.15	10.95	9.15	7.28	8.53	7.32	7.3	9.4	9.83	8.27	11.93	8.37	11.33	4.12	9.55	10.43	6.05	6.23	8	7.87	11.52	13.53	9.68	9.23	9.3	8.1	7.82	13.88	10.47	6.05	10.08	11.63	8.55	5.07	9.38	36.02	2.49	6.69	8.98	4.02	5.55	2.85	9.57
At1g65990	261971_at| type 2 peroxiredoxin-related / thiol specific antioxidant / mal allergen family protein|	1.08	1	0.75	1	1.03	1	0.7	0.97	0.82	1.02	0.88	0.93	1.1	0.9	1.3	2.55	0.97	0.77	0.72	1.17	0.63	0.65	0.8	0.77	0.98	1.03	1.08	0.55	0.8	0.75	0.98	0.85	0.85	0.87	0.92	1.13	0.88	1.43	0.83	0.6	2	0.94	0.57	0.77	2.48	0.53	0.93	1.08
At1g66490	256357_at| F-box and associated interaction domains-containing protein|	0.8	6.82	3.35	1.07	3.48	3.93	5.92	4.05	1.72	1.28	3.85	0.65	1.25	2.22	2.88	2.98	2.92	2.97	1.25	3.8	2.3	5	2.82	2.02	1.45	1.75	1.82	1.88	1.72	3.2	4.08	3.57	1.97	3.28	3.32	0.97	2	2.7	2.57	2.07	11.07	2.24	1.78	3.27	1.42	0.67	1.68	3.57
At1g67450	264231_at| F-box and associated interaction domains-containing protein|	5.82	11.53	8.28	9.58	9.92	6.12	10.25	8.3	4.67	6.8	9.82	6.07	10.63	7.02	12.87	9.45	8.72	3.57	4.3	8.77	4.32	4.28	6.22	5	7.18	5.55	4.93	7.33	6.97	5.3	10.92	8.9	7.72	7.8	5.3	5.82	9.83	7.87	7.75	5.47	16.55	3.39	7.68	12.35	8.45	6.23	8.27	11.55
At2g02660	267243_at| F-box associated ubiquitination effector family protein|	1.87	3.07	0.27	1.4	1.53	0.4	1.13	1.07	1.07	0.73	1.07	4.8	0.6	0.6	4.33	1.07	0.87	0.8	0.8	4.27	1.27	0.93	6.2	1.4	1.73	0.4	25.87	1.93	0.87	0.6	1.4	7.6	3.53	1.6	2.6	2.07	0.8	0.6	1.33	0.6	19.87	1.28	3.64	1.2	0.47	1.73	3	0.47
At2g04920	263625_at| F-box and associated interaction domains-containing protein|	9.25	12.07	9.37	9.87	10.3	10.07	10.55	9.47	9.62	9.43	8.43	10.27	9.18	8.47	10.05	11.85	10.47	8.05	8.77	13.13	10.53	11.58	9.83	7.77	8.85	10.03	9.78	9.57	7.67	11.47	9.83	11.32	7.55	12.1	11.83	12.7	13.52	11.3	12.4	8.85	18.5	13.95	8.02	11.57	10.1	8.32	13.15	15.53
At2g07140|At3g44120	266426_x_at| F-box and associated interaction domains-containing protein|F-box and associated interaction domains-containing protein|	36.92	14.38	34.12	23.98	25.7	21.28	21.67	18	23.9	21.22	19.52	21.67	16.55	21.33	21.45	24.23	17.82	11.98	9.07	7.2	27.72	6.98	9.28	7.68	7.37	5	7.55	3.37	8.8	7.22	13.25	7.85	6.03	3.85	8.25	17.3	8.02	16.53	7.67	24.63	2.9	11.66	20.28	13.43	23.78	26.13	31.98	11.77
At2g15640	265489_at| F-box family protein|	3.8	1.82	4.77	3.35	3.62	2.07	2.08	2.68	2.72	2.67	4.55	3.05	5.8	3.37	1.45	4.43	2.58	1.57	1.22	1.4	2.95	3.78	2.32	2.65	4.05	2.7	16.08	3.25	5.62	3.37	4	2.72	2.85	8.83	1.17	2.73	3.9	4.05	0.73	3.15	90.7	2.44	0.69	5.38	2.32	1.33	1.18	2.3
At2g16450	263611_at| F-box and associated interaction domains-containing protein|	2.97	4.55	1.5	0.95	4.88	3.13	5.92	3.08	0.75	2.95	3.1	2.52	2.55	3.58	3.13	6.73	2.42	1.65	2.83	1.37	0.62	11.52	7.55	11	2.02	4.07	67.72	1.77	2	4.05	1.28	4.93	4.53	4.65	3.28	0.82	2.38	6.7	1.73	1.98	70.82	6.6	0.31	3.45	6.1	5.32	5.48	6.3
At2g16810	265407_at| F-box and associated interaction domains-containing protein|	6.63	11.2	8.98	6.38	8.52	6.13	8.92	7.58	4.28	7.92	6.05	7.65	6.62	7.75	4.35	5.2	9.87	5.9	5.48	6.63	7.38	8.43	4.22	5.37	6.55	5.85	5.73	7.98	5.7	7.98	7.05	5.47	5.68	8.7	2.7	7.92	8.9	1.8	6.53	5.07	14.05	5.2	5.69	3.83	7.15	7.13	8.3	10.55
At2g17310	257408_at| SON1__F-box and associated interaction domains-containing protein|	11.72	19.92	11.57	11.08	13.93	7.13	12.53	12.28	5.52	7.4	10.75	11.15	8.93	12.55	13.72	4.15	7.32	9.42	6.43	7.6	9.28	10.25	7.05	6.98	8.27	8.13	10.88	11.07	6.97	12.85	14.18	10.8	10.45	11.55	8.08	14.07	15.08	10.9	9.27	7.63	35.73	4.34	9.53	11.68	62.28	32.52	27.1	15.82
At2g17830|At5g42460	264784_s_at| F-box and associated interaction domains-containing protein|F-box and associated interaction domains-containing protein|	37.48	26.32	45.27	40.5	49.73	33.28	36.15	31.4	46.3	53.37	31.57	31.05	33.02	34.4	34.35	30	24.3	32.78	33.5	29.3	33.57	27.2	23.22	26.07	17.52	22.88	20.85	26.07	21.55	24.15	31.68	16.32	9.07	12.58	26.83	32	27.98	19.13	41.35	34.42	25.15	29.97	16.7	35.48	39.37	41.27	62.18	45.08
At2g18780	266064_at| F-box and associated interaction domains-containing protein|	15.05	22.35	18.52	14.43	14.5	16.7	20.92	19.63	19.07	35.4	9.87	15.77	20.78	18.65	22.6	49.13	27.05	35.23	41.82	74.63	28.68	58.18	30.43	31.25	17.65	20.53	22.27	46.77	30.27	28.65	17.95	33.87	19.6	23.07	52.22	14.48	44.75	19.03	48.05	32.58	32.9	74.96	74.07	46.3	73.18	77.48	94.5	81.08
At2g19630	257383_at| F-box and associated interaction domains-containing protein|	2.45	4.2	2.98	2.87	2.5	0.82	2	1.87	3.57	2.92	3.4	2.12	1.72	2.53	2.88	2.17	5	0.87	1.03	2.08	0.53	0.52	1.98	1.97	3.15	1.05	1.28	2.63	2.2	1.7	2.82	2.27	0.75	3.33	1.07	1.43	2.28	0.65	1.57	2.77	6.73	2.2	3.83	1.7	0.53	1.4	1.08	0.48
At2g23160	245077_at| F-box family protein|	9.47	9.55	10.73	6.23	7.43	8.5	11.18	11.38	7.9	12.85	3.9	8.98	10.53	10.33	7.65	8.67	11.62	5.48	8.25	5.83	11.73	15.45	8.8	9.35	7.03	7.55	20.78	9.13	8.18	12.6	6.62	6.63	13.52	12.22	3.3	10.85	6.85	7.92	10.12	9.73	37.88	8.58	12.43	8.68	12.12	8.95	12.42	14.43
At2g27520	266252_at| F-box and associated interaction domains-containing protein|	15.92	14.53	13.7	12.13	16.52	13.68	16.9	16.58	13.07	10.57	15.07	10.2	15.53	12.33	14.63	12.3	8.38	8.13	8.85	20.95	11.82	16.73	11.18	14.37	9.92	13.47	12.73	10.73	12.88	13.52	11.85	12.37	11.4	9.07	10.43	16.68	13.75	9.9	9.83	8.52	12.13	13.82	3.76	16.92	13.5	12.48	16.7	15.72
At2g31470	263245_at| DOR__F-box and associated interaction domains-containing protein|	4.15	3.77	3.8	2.93	1.78	1.87	4.75	2.47	1.23	1.03	3.5	1.32	2.63	1.75	2.47	3.38	3.2	0.83	1.1	3.68	4.18	4.02	7.48	7.28	4.38	6.32	31.35	2.87	4.1	0.93	1.27	4.55	2.18	3.62	1.92	5.8	2.87	1.63	2.7	4.02	38.95	4.19	3.25	5.75	0.65	0.52	1.93	0.95
At2g34280	255592_s_at| F-box and associated interaction domains-containing protein|	4.72	6.43	8.08	7.47	8.45	5.08	6.9	5.98	5.28	4.93	5.6	7.33	7.63	7.1	7.33	5.77	6.08	29.67	6.4	7.08	5.87	5.97	4.87	5.63	5.6	8.33	7.95	6.33	4.42	8.22	9.85	6.18	4.72	7.68	6.05	6.85	5.2	7.18	4.4	4.45	30.67	4.93	5.78	5.8	11.32	12.37	6.92	6.67
At2g38590	266404_at| F-box and associated interaction domains-containing protein|	3.42	4.33	4.17	3.27	1.35	3.08	4.43	7.77	3.73	5.53	2.33	6.92	6.35	4.93	4.68	4.08	3.05	4.95	2.42	2.22	3.6	4.68	4.68	5.32	4.07	3.4	2.6	5.02	4.12	5.57	2.35	6.18	4.93	4.47	3.25	4.22	7.5	4.62	5.18	5.23	15.22	0.94	0.96	4.17	2.45	3.62	4.7	5.37
At2g40910	245091_at| F-box and associated interaction domains-containing protein|	6.33	6.27	7.82	5.78	5.52	5.43	7.47	6.38	6.18	8.97	8.22	2.92	7.17	5.02	3.8	4.28	5.5	3.02	8.38	7.22	8.85	4.65	4.65	3.38	6.73	2.37	1.57	6	6.07	2.55	4.5	3.25	3.07	7.8	4.8	8.63	7.12	6.53	1.52	7.8	8.28	5.57	6.17	3.85	2.62	6.22	11.25	8.93
At2g43260	266442_at| F-box and associated interaction domains-containing protein|	38.22	38.12	44.53	41.88	41.77	39.27	33.27	48.77	46.83	59.55	41.28	42.68	45.15	38.93	42.3	46.12	44.75	43.15	50.73	82.87	61.6	51.48	60.5	48.12	38.07	33.07	38.42	50.28	41.67	54.4	49.97	32.18	27.87	30.35	52.38	41.85	64.77	47.2	70.7	51.72	14.68	38.42	78.86	50.6	57.73	60.95	79.12	44.13
At3g04660	258841_at| F-box and associated interaction domains-containing protein|	3.8	4.57	8.57	6.95	4.88	3.87	5.02	3.37	6.43	4.93	6.78	4.98	5.72	5.05	4.23	3.52	8.47	5.05	2.13	4.75	4.67	5.13	7.25	6.8	3.7	4.45	8.5	5.63	1.37	4.4	2.97	5.33	4.85	8	6.38	4.35	5.48	3.52	4.22	6.03	3.75	6.24	7.07	4.18	12.17	11.22	16.17	14.98
At3g08750	258667_at| F-box and associated interaction domains-containing protein|	1.47	1.67	4.02	1.02	6.53	1.3	3.25	2.1	1.33	4.57	1.42	2.05	5.7	2.8	1.4	6.95	3.32	3.82	2.17	1.48	2.82	26.35	7.08	1.2	1.13	3.88	5.32	4.78	1.7	1.02	4.02	4.73	2.47	2.47	3.23	1.68	1.5	1.05	4.05	4.37	10.42	12.31	1.55	1.37	1.23	3.87	5.68	2.82
At3g10240	259139_at| F-box and associated interaction domains-containing protein|	8.13	4.35	4.9	7.47	9.33	5.82	7.4	5.1	6.93	3.07	4.52	7.77	6.97	7.1	7.82	8.72	5.82	6.12	6.23	5.35	2.65	10.55	3.22	6.25	7.03	7.17	6.43	1.35	4.05	3.05	6.03	3.15	4.72	3.58	4.15	4.58	8.83	2.82	2.17	2.92	13.63	4.2	2.6	6.6	4.65	1.72	3.52	4.08
At3g13680	256767_at| F-box and associated interaction domains-containing protein|	4.53	5.35	6.87	4.1	4.13	3.32	3.67	0.97	2.48	2.93	2.37	2.9	5.28	1.7	4.4	3.7	1.75	2.5	1.13	5.02	2.5	2.77	6.35	6.25	6.22	8.23	29.07	5.47	3.03	3.13	3.52	5.3	5.15	10.3	6.35	4.63	2.78	6.92	4.23	5.52	67.82	4.33	0.8	2.9	7.93	7.17	6.88	3.87
At3g13820	257603_at| F-box and associated interaction domains-containing protein|	1.72	6.9	1.83	3.32	3.63	3.55	2.43	4.73	2.72	1.65	1.53	1.38	1.08	1.53	2.27	2.65	3.78	1.02	0.77	4.4	1	3.93	3.88	3.65	2.87	2.97	9.97	2.07	5.38	3.4	4.65	1.45	2.78	2.2	2.27	4.47	4.52	5.02	4.68	2.6	51	2.65	5.06	4.73	0.48	1.9	3.03	1.62
At3g16580	258431_at| F-box and associated interaction domains-containing protein|	3	2.48	4.65	2.13	5.95	1.42	7.15	6.38	1.78	2.03	3.2	5.67	2.48	2.27	2.4	5.12	1.65	1.33	1.6	1.12	2.65	19.43	21.55	1.8	1.52	1.63	6.32	1.72	1.38	1.57	2.13	8.1	1.87	2.37	2.07	2.88	1.87	1.32	2.22	1.5	5.5	1.13	0.89	1.65	1.42	1.52	2.22	2.45
At3g16740	258435_at| F-box and associated interaction domains-containing protein|	59.02	43.25	74.78	72.32	65.18	57.18	67.53	52.87	63.58	56.18	56.73	64.13	65.13	54.23	49.9	111.67	72.8	72.03	68.73	70.15	57.08	66.62	61.67	53.45	49.92	50.75	61.63	66.65	59.1	51.17	62.9	51.38	83.93	72.85	62.35	42.22	66.85	50.4	85.2	62.27	70.8	233.09	64.35	49.62	61.05	71.32	77.72	66.37
At3g16880	257572_at| F-box and associated interaction domains-containing protein|	5.97	7.97	8.65	8.53	10.2	8.38	9.7	8.15	5.83	6.75	6.38	10.48	9.15	9.17	5.22	7.13	8.28	12.2	7.98	6.78	6.68	7.83	5.6	6.27	4.95	8.12	12.73	7.23	5.92	5.4	7.62	10.2	13.75	8.5	10.42	9.62	5.3	8.72	3.57	6.67	21.47	11.54	5.04	5.82	7.23	5.8	7.4	11.03
At3g17280	258411_at| F-box and associated interaction domains-containing protein|	9.88	13.4	15.75	13.35	14.18	13.4	11.45	13.08	18.73	10.18	14.18	10.88	7.88	11.28	14.17	27.12	16.83	22.3	13.73	10.52	14.65	8.22	6.92	8.17	7.93	8	14.3	7.42	11.13	7.75	16.85	10	6.18	7.98	11.15	6.88	13.22	9.22	12.67	11.8	14.82	12.51	10.07	13.65	10.33	13.47	9.38	7.4
At3g17490	258378_at| F-box and associated interaction domains-containing protein|	6.98	5.03	5.77	8.3	9.15	5.83	8.1	7.65	6.37	7.73	3.43	6.32	7.13	3.6	3.77	8.7	6.92	4.57	5.68	5.47	6.3	5.05	4.33	5.47	7.12	7.63	4.73	6.72	7	2.37	6.45	7.52	4.38	4.15	4.03	8.73	6.82	2.63	4.32	5.67	22.08	6.31	2.46	7.78	5.32	4.13	7.8	6.52
At3g17620	258407_at| F-box and associated interaction domains-containing protein|	4.08	10.05	10.35	8.23	2.25	1.43	7.13	8.77	9.88	2.9	3.32	7.27	7.35	6.07	7.82	3.27	3.93	3.02	4.17	9.03	2.88	9.1	3.73	4.87	5.07	7.32	5.5	6.17	3.67	5.67	6.93	1.63	3.43	5.9	9.33	2.68	5.9	2.03	5.73	3.7	8.88	3.57	7.92	9.43	4.25	3.97	8.32	7.27
At3g17710	258348_at| F-box and associated interaction domains-containing protein|	23.65	18.6	41.27	33.58	32.95	31.42	27.12	16.9	22.48	26.78	33.97	30.98	24.27	21.32	28	55.38	30.23	29.27	27.52	22.52	30.97	15.4	22.82	21.87	18.33	12.47	53.37	12.53	25.7	16.08	18.4	24.15	27.02	43.1	14.85	25.83	16.92	12.8	17.33	25.52	212.17	74.95	13.86	26	21.95	27.35	25.02	23.67
At3g18330	266435_s_at| F-box family protein|	0.97	2.82	1.22	0.53	0.7	0.3	2.33	1.42	1.97	2.4	0.67	0.38	0.73	1.6	1.15	1.78	2.58	1.93	0.75	3.23	1.67	1.93	1.28	2.53	4.33	2.03	4.33	0.45	0.62	2.02	3.57	2.05	1.83	0.82	1.08	2.48	3.15	0.73	3.67	1.82	19.63	0.63	1.54	2.37	1	0.72	2.27	0.75
At3g18340	266434_s_at| F-box and associated interaction domains-containing protein|	7.08	4.65	5.93	4.22	6.22	5.55	6.43	7.67	5.08	9.6	3.72	4.25	5.35	4.38	2.45	8.05	2.85	5.38	3.73	6.8	6.3	3.27	3.12	5.05	3.97	8.08	6	6.67	3.23	3.52	4.9	6.8	2.22	9.72	1.8	7.65	3.48	2.72	4.07	6.77	22.25	8.07	6	5.92	5.25	2.97	5.08	5.02
At3g18910	256943_at| ETP2__EIN2 targeting protein2|	24.55	38.45	32.13	28.43	26.93	31.87	31.05	40.52	40.25	46.33	27.67	27.02	30.37	38.98	34.55	27.45	26.98	47.13	38.83	49.17	47.13	49.78	38.15	37.23	17.42	27.52	22.28	41.4	32.32	42.75	28.82	16.52	16.82	15.68	41.78	25.22	58.35	33.33	70.68	43.5	32.88	25.23	36.82	38.92	41.48	37.35	42.7	32.45
At3g18980	256920_at| ETP1__EIN2 targeting protein1|	85.7	127.23	82.17	87.55	90.8	90.15	93.72	104.07	101.35	84.63	84.08	92.05	98.43	103.83	95.83	65.42	94.15	97.27	85.43	65.45	62.97	68.27	80.25	91.45	69.25	78.8	89.83	82.98	71.78	72.4	125.85	63.65	74.12	62.22	89.3	125.53	65.97	67.25	63.23	64.17	76.3	156.4	158.97	108.43	73.95	78.48	97.18	78.18
At3g19470	258019_at| F-box and associated interaction domains-containing protein|	7.73	12.2	12.95	12.52	15.6	12.78	9.98	12.92	23.27	29.12	11.8	9.6	11.85	12.3	15.72	18.35	9.78	30.07	29.92	12.27	22.42	10.08	11.85	10.28	11.12	4.7	13.87	10.63	12.7	12.65	13.25	12.98	9.63	6.53	21.32	11.27	14.57	11.4	13.1	19.4	26.43	54.77	21.75	31.72	15.23	14.18	14.92	17.3
At3g19880	257992_at| F-box and associated interaction domains-containing protein|	2.13	3.72	5.07	1.48	3.83	0.93	3.05	3.23	2.57	0.9	1.65	0.98	1.93	2.83	0.9	0.73	3.5	0.63	0.38	1.23	0.82	1.62	1.02	0.73	0.92	0.98	3.35	0.95	0.97	2.15	4.07	1.42	2.2	2.62	2.12	2.77	1.08	4.2	1.58	0.75	1.92	1.17	1.46	1.45	1.08	0.77	0.88	2.43
At3g19890	257993_at| F-box family protein|	5.35	2.5	1.47	1.25	2.42	1.4	3.75	4.42	2.92	3.9	2.13	1.82	2.65	2.5	3.53	1.77	3.05	1.13	0.5	2.58	1.9	4.02	4.63	2.25	2.12	2.58	7.35	2.12	1.95	2.78	2.12	2.95	3.33	3.72	1.25	5.2	2.5	1.33	1.88	0.7	15.72	3.18	0.96	5.65	3.22	1.75	3.12	3.6
At3g20030	257123_at| F-box and associated interaction domains-containing protein|	5.18	4.18	4.8	1.03	2.45	5.92	3.08	5.07	5.5	5.07	7.35	3.55	5.07	2.07	2.65	3.68	2.23	1.75	1.15	4.57	3.73	2.6	0.43	1.77	4.33	1.77	3.38	1.13	1	1.32	2.75	3.25	2.55	2.12	1.85	7.3	2.35	1.02	2.95	4.93	5.48	0.42	3.55	6.18	33.12	10.12	5.98	5.1
At3g20690	256699_at| F-box and associated interaction domains-containing protein|	2.07	0.92	0.65	3.32	1.87	0.68	2.25	4.22	0.57	0.73	2.53	0.82	1.83	0.93	0.97	1.98	0.65	2.65	0.65	1.17	1.22	1.55	2.78	1.83	0.5	1.05	2.05	1.92	0.42	0.58	0.93	1.92	2.18	1.23	4.15	0.85	1.75	0.9	3.88	1.95	16.02	0.52	0.28	1.68	0.68	0.6	3.07	1.57
At3g20710	257574_at| F-box family protein|	8.47	4.83	5.22	3.73	7.72	7.68	9.25	4.45	6.13	7.2	7.3	6.65	6.2	7.28	5.37	6	7.48	3.9	4.57	4.22	18.03	10.93	6.32	8.73	5.87	3.48	47.55	3.27	8.1	5.47	3.67	9.67	9.27	27.73	3.28	4.87	7.25	3.4	5.05	23.62	292.78	30.73	16.41	9.98	18.85	13.97	16.8	15.07
At3g21170	258032_at| F-box and associated interaction domains-containing protein|	8.18	7.83	4.72	6.3	10.78	4.35	9.78	5.52	5.67	12.95	9.53	6.35	4.27	7.38	6.9	8.42	7.12	5.18	6.37	8.47	10.63	5.7	4.78	8.18	4.08	7.25	9.42	5.43	5.93	10.32	6.4	6.23	8.33	9.02	5.98	12.08	14.82	2.27	9.93	9.3	38.12	2.29	4.29	4.22	10.23	6.47	11.25	10.62
At3g21410	256817_at| F-box and associated interaction domains-containing protein|	2.32	1.85	3.22	4.2	2.52	4.23	2.33	2.38	1.65	6.95	2.83	2.1	1.98	1.92	1.88	3.25	2.5	2.2	1.52	4.05	2.37	2.08	3.42	1.4	1.25	3.35	8.08	2.47	1.62	3.32	2.6	2.45	4.4	5.42	3.88	2.52	5.6	1.78	5.17	5.35	26.33	1.46	5.52	2.5	8.32	8.73	11.5	7.88
At3g22350	257537_at| F-box and associated interaction domains-containing protein|	7.15	9.07	6.17	4.27	8.12	6.02	11.88	12.73	7.65	6.9	5.33	6.83	10.07	5.33	7.95	8.52	6.88	9.53	5.67	11.23	12.23	9.68	9.13	8.43	6.62	12.93	7.18	8.35	7.5	11.92	7.95	7.28	8.63	9.43	3.52	12.33	11.48	10.88	7.72	6.5	17.12	9.61	6.13	9.63	9.93	9.2	14.65	11.03
At3g22650	258344_at| ATSFL61_CEG_SFL61__F-box and associated interaction domains-containing protein|	2.4	1.82	3.27	3.48	8.3	0.7	3.43	4.8	2.53	3.38	3.95	2.15	2.18	4.57	5.1	2.65	3.03	4.3	1.85	1.18	0.33	1.8	1.28	28.27	5.38	9.52	392.55	4.2	8.1	3.1	3.55	2.4	3.32	75.62	2.63	1.95	6.88	2.25	4.93	4.47	612.52	4.54	3.97	8.18	2.53	2.63	6.62	5.33
At3g22700	258319_at| F-box and associated interaction domains-containing protein|	0.98	1.53	0.82	1.55	0.82	2.85	1.23	1.7	4.6	1.53	1.78	3.93	0.8	4.93	3.03	2.6	1.73	3.48	1.83	0.95	1.42	5.13	1.97	1.37	0.87	0.75	2.92	1.85	1.28	1.02	0.92	4.05	1.95	1.38	0.78	1.23	0.93	3.78	1.6	2.22	1.52	3.98	4.62	2.97	3.07	2.13	4.05	3.5
At3g22710	258320_at| F-box family protein|	9.72	10.67	11.87	9.05	15.57	8.18	11.7	14.07	7.12	12.73	8.37	7.97	8.73	12.02	8.78	11.48	10.15	7.17	7.67	9.35	11.2	5.95	5.62	9.98	9.52	9.97	9.82	7.37	10.53	11.33	8.98	9.45	6.45	11.28	9.27	13.48	10.38	8.57	8.83	10.63	17.3	7.27	3.88	10.58	8.8	8.38	11.95	16.02
At3g22870	256831_at| F-box and associated interaction domains-containing protein|	11.2	14.48	14.9	14	12.95	10.25	13.87	16.67	8.8	16.32	13.9	11.03	14.45	14.62	13.43	11.95	16.68	11.3	10.65	16.62	13.27	13.22	12.5	10.03	11.13	15.13	14.87	10.52	11.4	13.42	15.27	14.92	12.65	15.7	13.75	17.22	17.45	11.45	12.7	10.8	31.8	8	11.01	15.63	13.57	12.37	16.38	15.4
At3g22940	256859_at| F-box associated ubiquitination effector family protein|	2.78	1.92	2.27	1.48	1.13	1.82	0.82	4.85	1.13	1.47	5.67	1.13	4.73	3.9	3.43	2.98	2.03	2.37	0.62	1.62	2.03	3.85	1.08	1.7	1.27	0.58	4.93	3.85	1.9	1.42	2.65	1.12	0.37	4.77	2.6	0.6	0.73	0.62	1.82	0.48	2.82	2.34	2.06	3.5	3.38	0.88	1.05	1.35
At3g23260	257920_at| F-box and associated interaction domains-containing protein|	12	12.8	13.63	15.87	12.47	10.55	10.38	13.65	11.07	19.72	12.33	8.63	8.83	12.35	16.15	21.45	15.83	16.28	14.18	13.68	16.82	15.63	16	14.73	15.6	18.23	19.88	16.15	11.88	10.82	13.23	14.7	11.9	22.28	12.65	12.12	16.25	10.3	14.62	29.82	34	36.52	15.3	21.03	8.32	7.9	19.32	21.88
At3g23880	256914_at| F-box and associated interaction domains-containing protein|	105.53	23.37	32.05	40.58	31.43	24.82	40.3	32.6	21.23	32.88	34.02	42	26.57	18.43	19.82	5.53	45	8.08	1.72	18.13	27.93	77.1	103.83	51.67	60.53	29.2	11	6.48	10.5	21.15	51.8	5.78	4.15	10.53	4.27	38.82	5.32	61.25	6	32.88	18.17	6.06	140.19	29.35	8.3	7.98	1.15	0.98
At3g23960	256903_at| F-box and associated interaction domains-containing protein|	7.38	8.75	6.55	6.2	5.12	5.27	6.72	5.37	6.2	4.03	9.72	3.87	7.65	5.67	5.23	8.4	10.58	7.3	5.05	6.38	7.28	8	6.55	5.93	6.15	4.1	5.85	2.7	7.33	6.4	11.38	7.48	6.57	4.02	1.75	4.98	4.9	5.08	2.55	3.87	19.77	5.59	2	5.42	5.53	6.63	6.45	4
At3g49450	252258_at| F-box and associated interaction domains-containing protein|	2.33	8.2	5.08	3.1	9.52	4	1.52	5.02	1.38	4.55	5.35	4.63	7.42	2.17	3.92	4.38	3.63	2.62	1.37	3.77	2.23	4.15	2.78	3.88	5.13	4.08	2.95	4.32	4.33	2.85	7.12	4.57	6.2	11.32	4.67	3.02	5.12	1.62	4.43	3.82	68.48	3.35	3.99	6.37	6.48	2.45	4.63	3.98
At3g49510	252262_at| F-box family protein|	7.67	3.45	4.33	0.9	6.52	4.8	6.62	9.6	4.05	5.77	5.6	4.73	3.5	4.13	6.27	6.32	4.8	2.52	2.7	4.48	4.03	3.43	4.12	3.28	2.72	6.8	5.58	4.53	4.07	3.65	3.28	3.33	2.77	3.88	2.92	6.68	4.28	4.25	4.32	3.9	12.98	2.33	1.96	5.97	5.02	3.23	3.35	4.07
At3g49520	252263_at| F-box and associated interaction domains-containing protein|	3.57	1.35	3.12	1.32	4.58	1.72	1.88	4.23	0.98	2.38	1.28	2.67	1.45	4.55	1.27	1.7	0.53	1.23	0.77	1.17	2.07	1.67	1.27	2.23	1.43	1.23	3.55	2.8	1.28	2.02	2.93	4.18	1.52	3.77	2.92	4.28	3.15	2.67	1.2	2.83	6.9	1.43	3.32	2.18	1.73	2.35	2.47	0.97
At3g59610	251473_at| F-box family protein / jacalin lectin family protein|	8.78	11.9	7.53	8.28	14.07	10.53	11.78	8.05	6.23	7.65	5.8	8.98	7.52	7.08	6.73	9.05	9.25	8.72	7.23	8.87	3.75	4.25	5.6	6.9	8.53	14.82	8.53	4.4	7.32	8.37	9.57	11.38	9.35	12.47	8.25	9.53	13.93	9.98	10.47	5.95	31.18	8.55	4.31	12.47	22.58	11.18	14.7	12.28
At3g61340	251366_at| F-box and associated interaction domains-containing protein|	10.83	13.9	9.83	11.23	13.17	9.08	13.03	11.13	6.7	7.95	9.17	10.4	10.5	8.2	11.53	7.6	8.52	7.05	4.8	8.88	9.35	23.03	13.37	10.57	9.07	12.07	15.93	7.2	9.33	7.9	10.77	11.3	8.88	9.23	9.03	11.9	12	9.07	6.1	8.2	54.5	11.37	5.07	9.72	8.27	10.73	13.55	12.55
At4g04690	255289_at| F-box and associated interaction domains-containing protein|	18.62	11.28	17.23	10.55	20.72	12.42	15.25	15.35	12.58	12.33	11.7	11.07	13.08	13	13.53	15.87	11.85	11.07	8.1	14.87	10.8	30.1	10.38	14.82	9.52	12.05	21.1	13.65	12.77	13.42	17.57	12.63	12.02	12.12	8.18	13.1	14.9	8.52	10.05	10.6	62.72	8.33	5.49	13.03	13.05	8.27	10.32	13.52
At4g05080	255256_at| F-box and associated interaction domains-containing protein|	2.1	1.42	1.68	0.82	2.77	1.5	2.37	0.73	1.47	1.05	0.3	2.7	1.4	1.27	1.42	2.03	1.42	3.42	1.28	4.05	2.95	1.78	0.87	2.73	1.98	1.52	1.02	0.83	1.1	1.87	1.53	3.97	2.08	2.62	2.68	0.88	2.78	2.25	0.98	3.42	6.47	2.08	2.42	4.35	2.22	2.13	2.73	1.47
At4g11590	254875_at| F-box associated ubiquitination effector family protein|	8.5	6.68	6.33	5.68	6.58	5	5.82	6.8	3.78	6.98	8.43	6.58	7.15	8.68	6.25	7.7	3.85	2.9	5.62	5.85	5.97	5.37	6.5	9.37	6.65	8.28	7.38	4.57	5.32	8	4.4	8.18	4.68	4.88	2.05	8.67	6.22	6.65	6.73	5.4	17.88	5.54	3.86	5.25	6.03	7.87	6.73	10.32
At4g17200	245409_at| F-box and associated interaction domains-containing protein|	6.13	5.48	8.05	8.33	9	6.38	6.32	9.78	6.93	5.8	6.85	5.52	5.4	8.15	5.13	4.7	8.87	4.72	5.25	8.72	8.28	15.47	8.42	6.07	5.87	8.58	2.62	5.2	5.1	5.53	3.88	8.05	3.88	8.87	5.32	8.32	8.93	3.9	8.18	8.02	15.78	3.6	4.54	11.1	4.92	4.77	6.82	7.4
At4g19940	254519_at| F-box and associated interaction domains-containing protein|	6.55	10.95	8.55	8.15	7.8	5.17	2.15	4.9	5.77	7.17	4.88	4.63	5.93	6.72	9.45	13	5.28	7.12	5.92	9.47	3.37	5.23	8.92	4.15	1.75	9.42	8.1	8.12	5.98	4.52	9.97	4.52	1.82	10.38	5.28	8.42	6.73	8.67	5.43	8.62	30.3	4.69	5	6.67	13.5	5.53	9.13	4.25
At4g21240	254426_at| F-box and associated interaction domains-containing protein|	5.13	7.42	6.1	5.85	10.78	9.25	7.78	7	6.62	9.82	5.25	8.42	4.9	5.32	2.65	7.42	4.67	4.67	2.9	7.63	4.07	6	3.75	8.08	3.57	7.27	4.02	5.55	5.38	5.83	4.75	7.02	6.62	8.9	7.2	10.37	6.83	3.3	6.75	6.15	17.47	7.77	4.11	7.93	2.42	4.3	4.48	9.32
At4g33290	253376_at| F-box and associated interaction domains-containing protein|	4.78	5.12	4.88	2.88	3.98	4.18	4.73	5.22	5.12	1.68	1.6	4.42	5.27	3.12	3.88	5.18	3.22	2.68	2.35	4.75	4.43	5.22	4.57	4.37	3.52	4.85	3.68	3.3	3.17	3.62	3.72	5.13	4.43	2.35	2.87	5.2	2.88	3.48	2.55	8.68	8.48	2.88	4.28	2.77	3	2.83	5.18	5.52
At4g38870	252966_at| F-box and associated interaction domains-containing protein|	14.05	9.93	24.78	14.27	9.17	10.58	14.62	8.32	11.4	8.73	10.75	12.57	11.6	9.4	13.38	23.33	7.07	5.78	4.98	8.78	8.25	8.07	13.83	11.87	8.2	8.38	35.9	7.57	9	12.95	9.12	11.35	9.33	20.17	7.82	11.1	10.18	9.97	5.9	5.1	62.87	8.16	9.35	12.6	7.68	6.13	5.9	7.57
At5g18160	250019_at| F-box and associated interaction domains-containing protein|	2.27	1.72	0.97	1.77	1.27	2.05	1.28	1.8	2.4	5.42	1.5	1.07	1.95	0.67	2.42	1.98	0.77	2.2	1.25	1.1	2.03	1.07	2.42	1.18	0.85	1.93	1.25	1.13	1.75	2.12	0.87	1.92	1.4	0.87	1.12	2.27	2.08	1.67	2.12	1.3	2.1	1.27	0.89	0.92	0.6	0.75	2.43	1.28
At5g37040	249647_at| F-box family protein|	29.12	30.93	25.37	22.87	28.02	23.27	22.97	28.93	25.12	21.68	25.37	23.82	23.28	19.03	21	18.75	20.77	19.35	13.35	17.95	20.95	36.78	19.55	21.9	18.5	16.72	44	17.23	16.48	28.85	21.7	20.08	17.27	19.77	14.05	36.72	28.95	12.57	20.92	23.47	66.95	12.1	14.15	23.43	17.27	16.35	26.62	19.87
At5g41490	249305_at| F-box associated ubiquitination effector family protein|	1.4	2.3	3.48	1.73	1.57	2.8	3.73	4.3	2.23	2.35	3.5	4.22	6.88	1.37	2.23	3.7	2.57	0.48	1.68	1.62	1.02	1.77	1.68	1.72	2.88	0.7	5.03	2.77	1.97	4.13	1.05	1.37	2.95	1	0.73	4.17	2.6	1.12	1.77	1.17	2.57	3.34	0.44	4.25	0.73	1.45	2.52	4.32
At5g52620	248314_at| F-box associated ubiquitination effector family protein|	5.47	4.88	6.38	2	2.28	2.72	2.02	5.43	3.47	3.15	2.33	4.67	1.47	7.47	2.77	2.83	4.82	2.83	3.2	4.9	4.08	6.43	7.68	5.43	5.92	3.85	11.42	5.6	3	3.28	2.02	2.58	2.77	6.1	3.9	3.78	6.22	1.28	3.83	2.58	27.53	3.95	2.19	3.35	5.65	4.4	5.12	4.47
At5g65850	247167_at| F-box and associated interaction domains-containing protein|	26.45	16.67	35.05	23.75	25.5	17.63	19	14.13	16.1	28.82	15.1	22.03	16.88	18.83	18.83	52.48	22.12	15.72	10.78	33.25	33.5	33.55	28.23	26.8	21.48	22.53	25.08	40.58	26.93	18.12	13.6	31.02	17.87	14.87	32.45	16.87	21.88	14.92	17.68	30.07	27.12	55.76	22.31	27.92	34.98	27.13	34.68	29.47
[truncated: 72 more columns]
