# Supplementary material for: Plant F-Box Protein Evolution Is Determined by Lineage-Specific Timing of Major Gene Family Expansion Waves
Source: PLoS One. 2013 Jul 19;8(7):e68672. doi: 10.1371/journal.pone.0068672 (PMC3719486; doi:10.1371/journal.pone.0068672)
Supplement: Dataset S3 — (XLS) [file pone.0068672.s012.xls]

## Sheet: Tabelle1
singleton	39 Rice FBAs	chromosomal position	37 Sorghum FBAs	chromosomal position	6 Vitis FBAs		47 Poplar FBAs	chromosomal position	7 Physcomitrella FBAs	Chromosomal coordinates	3 Selaginella FBAs	Chromosomal coordinates
unstable	OS02G10600		SB01G003460		VV00G26390		548689		PP00004G01380	2376600 - 2378105	SM00020G00070	49552 - 51047
stable	OS02G33840		SB01G013220	12239089 - 12241521	VV05G01300		587549		PP00052G00340	710082 -712284	SM00036G02730	1375316 - 1376116
Tandem	OS02G35560		SB01G013240	12269556 - 12271865	VV12G12100		PT00G00150		PP00066G00750	637773 -650674	SM00101G00940	580064 - 581493
	OS03G25640		SB01G018980		VV15G05810		PT00G20680		PP00129G00630	1134739 -1135794
	OS03G46690		SB01G031390		VV17G04830		PT01G00950	892738 - 894372	PP00153G00370	521172 -522891
	OS04G11450		SB01G034970		VV18G05960		PT01G00970	897059 - 899997	PP00198G00100	86916 -88176
	OS04G11660		SB01G037880				PT01G07090		PP00217G00290	313195 -314520
	OS04G11790		SB02G001040		no tandems		PT01G22390
	OS04G50200		SB02G005020	5782028 - 5785242			PT01G31810	30869853 - 30871813	no unstable genes present		no unstable genes present
	OS05G02570		SB02G005060	5831148 - 5838497			PT01G31820	30872855 - 30873973	all stable genes are not in tandem		all stable genes are not in tandem
	OS05G08010		SB02G005100	5910077 - 5911291			PT01G39770
	OS05G08350		SB02G005870	7048805 - 7049938			PT01G45310
	OS05G08440	4610903 - 4612265	SB02G005880	7065276 - 7067165			PT02G11760
	OS05G08460	4621850 - 4623022	SB02G005890	7090700 - 7091920			PT02G21670
	OS06G07380		SB02G008113				PT03G05100
	OS06G07460		SB02G023440				PT04G00070
	OS07G08570		SB02G027685	62961321 - 62962574			PT05G26460
	OS07G09710		SB02G027700	62985031 - 62986119			PT06G01110	750780 - 751922
	OS07G09814		SB03G044080				PT06G01180	795394 - 797002
	OS07G09870		SB04G000800				PT06G17060
	OS07G13870	7938947 - 7940131	SB04G003010				PT07G07250
	OS07G13890	7942368 - 7943561	SB04G006790				PT08G00550
	OS07G16420		SB04G025085				PT08G03600
	OS07G16800		SB04G026045				PT08G14110
	OS07G35050	20998787 - 20999920	SB05G020470				PT08G20240
	OS07G35060	21002244 - 21003377	SB05G025730	59140907 - 59142129			PT08G21000
	OS08G10340		SB05G025750	59170497 - 59171603			PT08G22150
	OS08G36960		SB06G027040				PT08G22370
	OS08G38490		SB08G003880				PT10G14750
	OS09G20650		SB08G015610				PT10G20310
	OS09G27570		SB08G021860	53609005 - 53611165			PT11G03590
	OS09G30180		SB08G021900	53644114 - 53646360			PT11G11420
	OS09G34200		SB08G022710				PT11G13270
	OS10G04850		SB09G027720				PT12G01970	1791363 - 1792526
	OS10G25210		SB09G030410				PT12G02000	1835369 - 1836598
	OS10G25660		SB10G010900				PT13G04830
	OS12G03440		SB10G024600				PT13G08850
	OS12G06740						PT13G09490
	OS12G30920						PT14G01460
							PT14G15870
	0% unstable are tandems		no unstable genes present				PT14G19140
	16.7 % der stable genes are tandems		41.2 % of stable genes are tandems				PT15G01390	993777 - 994916
							PT15G01430	1024238 - 1025416
							PT16G01220
							PT17G08290	7060721 - 7061803
							PT17G08370	7142858 - 7143982
							PT17G10020
							44.4 % of unstable genes are tandems
							13.3 % of stable genes are tandems
